# Supplementary material for: A High-Speed Congenic Strategy Using First-Wave Male Germ Cells
Source: PLoS One. 2009 Mar 31;4(3):e4943. doi: 10.1371/journal.pone.0004943 (PMC2659429; doi:10.1371/journal.pone.0004943)
Supplement: Table S1 — Variation alleles between C57BL/6 and DBA/2 mouse strains. (0.02 MB XLS) [file pone.0004943.s001.xls]

## Sheet: B6xD2
Table S1. Variation alleles between C57BL/6 and DBA/2 mouse strains.
Chromo- some	Locus	cM	bp	DBA/2		Chromo- some	Locus	cM	bp	DBA/2
1	D1Mit170	19.5	104	<B6		9	D9Mit50	49	159	<B6
	D1Mit24	41	202	<B6			D9Mit18	71	180	B6<
	D1Mit387	62	125	<B6		10	D10Mit3	21	244	<B6
	D1Mit33	81.6	100	<B6			D10Mit42	44	184	B6<
	D1Mit361	101.5	171	<B6			D10Mit180	64	134	B6<
	D1Mit155	112	252	<B6		11	D11Mit20	20	114	B6<
2	D2Mit293	11	190	B6<			D11Mit219	43	132	B6<
	D2Mit433	31.7	173	<B6			D11Mit333	66	125	<B6
	D2Mit394	53.6	121	<B6		12	D12Mit153	15	142	B6<
	D2Mit304	73	118	B6<			D12Mit34	29	171	B6<
	D2Mit456	86.3	123	B6<			D12Mit7	50	105	B6<
3	D3Mit151	18.5	149	B6<			D12Mit17	58	168	<B6
	D3Mit230	38.3	147	B6<		13	D13Mit3	10	162	B6<
	D3Mit252	58.8	233	B6<			D13Mit250	35	123	<B6
	D3Mit147	79.4	134	B6<			D13Mit213	59	149	B6<
4	D4Mit171	6.3	318	B6<		14	D14Mit259	19.5	125	B6<
	D4Mit111	21.9	129	B6<			D14Mit193	40	118	B6<
	D4Mit178	35.5	147	B6<			D14Mit75	54	179	B6<
	D4Mit308	57.4	88	B6<		15	D15Mit5	22.2	101	B6<
	D4Mit234	71	148	<B6			D15Mit237	42.8	119	<B6
5	D5Mit294	8	195	<B6			D15Mit193	57.9	129	<B6
	D5Mit394	34	150	<B6		16	D16Mit131	4.3	140	B6<
	D5Mit398	45	110	B6<			D16Mit59	27.8	186	B6<
	D5Mit161	70	119	B6<			D16Mit50	53.5	130	<B6
6	D6Mit74	20.5	150	<B6		17	D17Mit16	17.4	123	<B6
6	D6Mit102	38.5	145	B6<			D17Mit218	42	116	<B6
	D6Mit254	60.55	118	<B6			D17Mit123	56.7	133	B6<
	D6Mit15	74	253	<B6		18	D18Mit68	11	113	<B6
7	D7Mit246	15	137	B6<			D18Mit124	32	150	<B6
	D7Mit318	37	150	<B6			D18Mit184	41	172	<B6
	D7Mit66	57.5	162	<B6			D18Mit80	50	110	B6<
	D7Mit189	72.4	133	<B6		19	D19Mit41	16	164	<B6
8	D8Mit94	13	154	<B6			D19Mit53	43	111	<B6
	D8Mit293	21	120	B6<			D19Mit33	53	262	B6<
	D8Mit81	41	136	B6<		20	DXMit166	15.5	114	B6<
	D8Mit271	57	96	B6<			DXMit143	26	189	B6<
9	D9Mit90	9	140	B6<			DXMit117	50.8	122	B6<
	D9Mit229	28	142	B6<
cM: map position in centimorgans, bp: size of reported allele in base pairs, both were obtained from the MGI database (http://www.infomatics.jax.org/locus.html), B6<: DBA/2 allele larger than C57BL/6 allele size, <B6: DBA/2 alleles smaller than C57BL/6 allele size.
